# Supplementary material for: Discovery of potential protein biomarkers associated with sugarcane white leaf disease susceptibility using a comparative proteomic approach
Source: PeerJ. 2022 Jan 5;10:e12740. doi: 10.7717/peerj.12740 (PMC8742537; doi:10.7717/peerj.12740)
Supplement: Supplemental Information 1 [file peerj-10-12740-s001.xlsx]

## Sheet: Sheet1
Protein	ID Details	Peptide	ID Score	Mass stdev (Da)	MH+ (Da)	p-value (ANOVA)	K88-92	K95-84	KK3	UT1
A0A3P3YUG5	ATP synthase subunit beta OS=Saccharum spontaneum OX=62335 GN=atpB PE=3 SV=1	AVSMSATDGLMR	8.88	0.275038	1254.64	0.00264034	21.6231	18.7753	0	23.4329
A0A059PZS3	Kinase OS=Saccharum hybrid cultivar R570 OX=131158 GN=SHCRBa_049_K23_R_70 PE=4 SV=1	HLSGKK	2.43	0.221323	669.434	0.0405807	22.896	21.6184	23.3484	23.2248
A0A059Q0G9	CaM_binding domain-containing protein OS=Saccharum hybrid cultivar R570 OX=131158 GN=SHCRBa_162_H04_R_100 PE=4 SV=1; CaM_binding domain-containing protein OS=Saccharum hybrid cultivar R570 OX=131158 GN=SHCRBa_162_H04_R_10 PE=4 SV=1	EKPVPHYLR	2.41	0.140005	1138.53	0.0100729	20.6653	22.9288	22.8703	22.2717
A0A023Q225	NADH-cytochrome b5 reductase OS=Saccharum hybrid cultivar ROC22 OX=676074 GN=b5R PE=2 SV=1	DELDSMAK	10.69	0.0781213	924.059	0.0367043	21.8182	21.2528	21.43	21.509
A0A5N5XX30	Holo-[acyl-carrier-protein] synthase OS='Saccharum officinarum' phytoplasma SCGS OX=2609813 GN=acpS PE=4 SV=1	AYQKGNLK	4.7	0.123005	922.172	0.0395301	19.0743	19.4125	19.8132	21.4768
A0A059Q2Y9	RING-type domain-containing protein OS=Saccharum hybrid cultivar R570 OX=131158 GN=SHCRBa_107_F16_F_230 PE=4 SV=1	AAAPGSK	8.14	0.162477	600.348	0.0212856	17.4078	19.4361	20.2766	21.0834
A0A0K0KS99	Transcription factor OS=Saccharum officinarum OX=4547 GN=DREB2B PE=2 SV=1	AMYGDLAR	4.84	0.162331	895.317	0.00786015	19.2111	0	0	21.0708
A0A2R4QNA4	Uncharacterized protein OS=Saccharum hybrid cultivar SP80-3280 OX=193079 GN=Sh098J09_g0230 PE=4 SV=1; Uncharacterized protein OS=Saccharum hybrid cultivar SP80-3280 OX=193079 GN=Sh064N22_g0080 PE=4 SV=1; Uncharacterized protein OS=Saccharum hybrid cultivar SP80-3280 OX=193079 GN=Sh038L23_g0100 PE=4 SV=1	DFLGEIAR	4.45	0.180984	921.735	3.23541e-07	0	22.6184	21.7061	20.8392
A0A2R4QND2	FtsH protease OS=Saccharum hybrid cultivar SP80-3280 OX=193079 GN=Shy3280Sca012_096 PE=3 SV=1; FtsH protease OS=Saccharum hybrid cultivar SP80-3280 OX=193079 GN=Shy3280Sca009_102 PE=3 SV=1	DIMPEK	7.9	0.23389	745.363	0.0158734	19.6235	0	0	20.7974
A0A059Q0D2	CS domain-containing protein OS=Saccharum hybrid cultivar R570 OX=131158 GN=SHCRBa_024_F14_R_20 PE=4 SV=1	KEGKPPVFLK	3.03	0.356265	1144.89	0.0252259	16.9647	19.1119	0	20.7385
A0A1J0M563	Non-specific serine/threonine protein kinase OS=Saccharum hybrid cultivar ROC22 OX=676074 PE=2 SV=1; Non-specific serine/threonine protein kinase OS=Saccharum hybrid cultivar ROC22 OX=676074 PE=2 SV=1	RILEPNPMK	4.33	0.235679	1113.89	0.0305211	18.1313	17.2297	15.8328	20.6937
Q5Q0X7	60S ribosomal protein L36 OS=Saccharum officinarum OX=4547 PE=2 SV=1	APPQPK	6	0.262253	636.555	1.00052e-09	19.6298	21.2707	0	20.6458
A0A2U9I6R2	CLD1 OS=Saccharum hybrid cultivar OX=128810 PE=2 SV=1	MHGFLPGVRR	3.26	0.157661	1186.28	0.0251075	22.1789	22.1655	20.0683	20.5777
A0A5N5XVS1	Leucine--tRNA ligase OS='Saccharum officinarum' phytoplasma SCGS OX=2609813 GN=F2B49_00225 PE=4 SV=1	ALNNHK	10.19	0.154321	697.194	0.0157004	17.4356	17.3936	0	20.4987
Q9YX37	Uncharacterized protein VP9-2 OS=Fiji disease virus (isolate Sugarcane) OX=648172 GN=S9 PE=4 SV=1	VETTTMK	1.94	0.256638	810.322	0.0320446	18.146	17.7975	17.9019	20.3747
A0A059Q1V0	Uncharacterized protein OS=Saccharum hybrid cultivar R570 OX=131158 GN=SHCRBa_019_F13_F_90 PE=4 SV=1	AASTSR	4.23	0.278123	592.595	0.0154284	19.484	0	0	20.3683
A0A2H4YIT5	Expansin OS=Saccharum hybrid cultivar OX=128810 GN=EXP90 PE=2 SV=1	TYQATK	4.43	0.243397	711.89	0.00826687	21.5947	19.2929	0	20.3608
A0A059VJC1	BZIP transcription factor 23 (Fragment) OS=Saccharum hybrid cultivar CoC 671 OX=672237 GN=bZIP23 PE=2 SV=1	AASPPEYMTSGSPAR	2.85	9.26184e-13	1538.23	0.0100426	20.5965	0	19.8039	20.3552
A0A059Q1L9	RanBD1 domain-containing protein OS=Saccharum hybrid cultivar R570 OX=131158 GN=SHCRBa_168_J15_R_120 PE=4 SV=1	DAVESHK	6.6	0.330594	787	0.0215121	16.9344	20.6803	22.1818	20.3476
A0A059Q2D4	Uncharacterized protein OS=Saccharum hybrid cultivar R570 OX=131158 GN=SHCRBa_168_J15_F_160 PE=4 SV=1	MHPLR	1.2	0.256644	669.395	0.0167871	21.8459	15.6335	18.7302	20.168
A0A059PZN8	Homoserine kinase OS=Saccharum hybrid cultivar R570 OX=131158 GN=SHCRBa_008_B11_R_60 PE=3 SV=1	AALPK	10.31	0.098445	499.641	0.00928038	21.7003	18.7562	21.2123	20.0588
A0A5N5XSG3	Heavy metal translocating P-type ATPase OS='Saccharum officinarum' phytoplasma SCGS OX=2609813 GN=F2B49_00980 PE=4 SV=1	NGKSLDVFSNIR	2.52	0.0756958	1349.81	0.0116418	20.4812	0	0	20.0474
A0A0N9HRI7	Non-specific lipid-transfer protein OS=Saccharum hybrid cultivar FN02-3924 OX=1729589 PE=2 SV=1	AMALPGK	3.02	0.175563	703.02	0.00965144	19.197	19.4258	0	20.0073
A0A172ML95	Chlorophyll a-b binding protein, chloroplastic OS=Saccharum officinarum OX=4547 GN=Lhca3 PE=2 SV=1	FAMLGAAGAIAPEVFGK	67.07	0.304734	1666.13	0.00953485	19.3826	0	21.4929	19.9618
A0A059Q2M5	Uncharacterized protein OS=Saccharum hybrid cultivar R570 OX=131158 GN=SHCRBa_261_O20_R_150 PE=3 SV=1	DGELSVFGR	11.19	0.236672	979.698	0.018305	17.9753	0	0	19.9324
A0A2R4QNM3	Myosin heavy OS=Saccharum hybrid cultivar SP80-3280 OX=193079 GN=Shy3280Sca042_071 PE=4 SV=1	ALAEAELR	10.81	0.165001	868.302	0.0117985	0	0	19.9114	19.8767
K4FC67	Chloroplast oxygen-evolving enhancer protein 1 (Fragment) OS=Saccharum hybrid cultivar OX=128810 GN=OEE1 PE=2 SV=1	AEGIAK	7.56	0.107884	587.986	0.012051	17.714	17.4263	18.5539	19.6956
A0A059Q1N9	Peptidyl-prolyl cis-trans isomerase OS=Saccharum hybrid cultivar R570 OX=131158 GN=SHCRBa_166_F02_R_150 PE=3 SV=1; Peptidyl-prolyl cis-trans isomerase OS=Saccharum officinarum OX=4547 GN=CyP PE=2 SV=1; Peptidyl-prolyl cis-trans isomerase OS=Saccharum hybrid cultivar R570 OX=131158 GN=SHCRBa_172_K24_R_280 PE=3 SV=1	IVMELYANEVPK	5.98	0.150149	1422.2	1.85074e-13	0	0	0	19.6355
A0A2R4QNP7	Hexosyltransferase OS=Saccharum hybrid cultivar SP80-3280 OX=193079 GN=Shy3280Sca044_076 PE=3 SV=1	ATAPPAKR	8.69	0.243099	808.023	0.0113392	21.6459	0	0	19.6235
A0A059Q0U2	YZ1 protein OS=Saccharum hybrid cultivar R570 OX=131158 GN=SHCRBa_022_D05_R_20 PE=4 SV=1; YZ1 protein OS=Saccharum hybrid cultivar R570 OX=131158 GN=SHCRBa_012_A01_R_20 PE=4 SV=1	MAREAASK	2.08	0.215698	864.331	0.0121378	21.3985	0	0	19.5044
A0A2R4QNP6	Serine O-acetyltransferase OS=Saccharum hybrid cultivar SP80-3280 OX=193079 GN=Shy3280Sca051_115 PE=4 SV=1	VLALALQSR	1.98	0.0461135	971.476	0.035909	18.3882	19.1735	18.5775	19.2741
A0A059PZ74	Phosphoglucomutase OS=Saccharum hybrid cultivar R570 OX=131158 GN=SHCRBa_018_K13_F_200 PE=3 SV=1	DNLGGDK	5.31	0.325595	718.705	0.0242404	17.0163	0	0	19.2667
A0A059Q3A1	PAS domain-containing protein OS=Saccharum hybrid cultivar R570 OX=131158 GN=SHCRBa_268_K21_R_240 PE=4 SV=1; Flavin-biding kelch repeat f box 1 OS=Saccharum hybrid cultivar R570 OX=131158 GN=SHCRBa_089_D15_R_140 PE=4 SV=1	DGAPLYNR	6.26	2.34831e-13	902.728	0.00638102	19.1975	0	0	19.1596
A0A0A0UE78	Endoglucanase OS=Saccharum spontaneum OX=62335 GN=SES23K06_013 PE=3 SV=1; Endoglucanase OS=Saccharum officinarum OX=4547 GN=LA57E04_014 PE=3 SV=1; Endoglucanase OS=Saccharum hybrid cultivar OX=128810 GN=Sh253G12g_350 PE=3 SV=1	TCDPAYSSKLLQTAQK	4.64	4.60852e-13	1810.23	0.004579	21.0612	20.0864	0	19.0304
A0A0A0UE87	Putative histone lysine N-methyltransferase ATXR6 OS=Saccharum officinarum OX=4547 GN=LA146H19_001 PE=4 SV=1	TPPGPRLEAAAAAGDDDDVR	2.73	0.221763	1993.44	0.00512205	15.8105	16.8165	0	18.9416
A0A1L2JKH0	Putative wall-associated receptor kinase-like protein OS=Saccharum hybrid cultivar R570 OX=131158 GN=Sh245M18_g0040 PE=4 SV=1; Putative wall-associated receptor kinase-like protein OS=Saccharum hybrid cultivar R570 OX=131158 GN=Sh026K20_g0020 PE=4 SV=1; Putative wall-associated receptor kinase-like protein OS=Saccharum hybrid cultivar R570 OX=131158 GN=Sh026K20_g0030 PE=4 SV=1; Wall-associated ki…	RAELFR	4.77	0.131039	791.773	0.0260574	17.4644	18.0286	17.3468	18.7364
A0A2R4QNQ8	Kinase 4 OS=Saccharum hybrid cultivar SP80-3280 OX=193079 GN=Shy3280Sca054_045 PE=4 SV=1	MIIPPVEPEK	2.13	0.043071	1169	3.89387e-07	0	17.7499	16.8942	18.7169
A0A059Q0R1	Ribonuclease T2 family protein OS=Saccharum hybrid cultivar R570 OX=131158 GN=SHCRBa_022_I19_R_70 PE=3 SV=1	ILLPTQTMLN	5.68	0.17662	1142.33	0.0287494	22.6049	15.6286	18.5121	18.6684
A0A059Q2L6	Oxygenase OS=Saccharum hybrid cultivar R570 OX=131158 GN=SHCRBa_102_M12_R_240 PE=3 SV=1	AMGYMEFMK	1.16	0.0046857	1139.65	4.69136e-11	0	0	19.2083	18.6493
A0A059PZQ9	Uncharacterized protein OS=Saccharum hybrid cultivar R570 OX=131158 GN=SHCRBa_159_H10_R_10 PE=4 SV=1	YVSNISATSVLMAR	5.49	6.91277e-13	1508.33	0.0369938	18.4135	20.4086	19.7016	18.6376
A0A059Q0Q8	Transporter OS=Saccharum hybrid cultivar R570 OX=131158 GN=SHCRBa_017_P09_F_230 PE=4 SV=1	QVEILFR	28.97	0.275116	904.234	0.0128605	18.5707	14.4672	17.6898	18.5893
A0A0C6WCK8	ScMYB29 protein OS=Saccharum hybrid cultivar Co 86032 OX=672234 GN=scMYB29 PE=2 SV=1; MYB transcription factor 82 (Fragment) OS=Saccharum hybrid cultivar CoC 671 OX=672237 GN=MYB82 PE=2 SV=1	NAALKK	3.55	0.144515	641.43	0.00317618	20.5224	0	0	18.5842
A0A059VPC9	TLP transcription factor B (Fragment) OS=Saccharum hybrid cultivar CoC 671 OX=672237 GN=TLPB PE=2 SV=1	TPSPSSLDLK	11.53	0.283265	1045.82	0.00863594	18.4908	19.9665	20.0708	18.57
Q5XLI1	D-type cyclin OS=Saccharum hybrid cultivar ROC16 OX=765393 GN=CycD4.2 PE=2 SV=2	DAVDWIWK	3.67	0.115899	1033.42	0.015733	16.8104	0	0	18.4771
A0A5N5XVA4	Valine--tRNA ligase OS='Saccharum officinarum' phytoplasma SCGS OX=2609813 GN=F2B49_01345 PE=4 SV=1	DIISKK	13.74	0.244439	703.222	0.0139002	20.7749	0	0	18.4771
A0A059PZR6	Uncharacterized protein OS=Saccharum hybrid cultivar R570 OX=131158 GN=SHCRBa_252_E12_F_20 PE=4 SV=1; Uncharacterized protein OS=Saccharum hybrid cultivar R570 OX=131158 GN=SHCRBa_127_L16_F_240 PE=4 SV=1	SSQAK	3.13	0.361917	520.664	0.00981224	18.379	18.8804	0	18.4377
A0A5N5XRF7	Uncharacterized protein OS='Saccharum officinarum' phytoplasma SCGS OX=2609813 GN=F2B49_01985 PE=4 SV=1	AENTSK	1.6	0.209007	647.419	0.00642262	17.6386	0	17.5624	18.4095
A0A059Q0L2	Uncharacterized protein OS=Saccharum hybrid cultivar R570 OX=131158 GN=SHCRBa_028_E10_F_330 PE=4 SV=1	DSEGDVR	1.96	0.188687	777.361	0.0428762	16.5539	19.6705	19.7499	18.3326
A0A059Q265	Serine protease OS=Saccharum hybrid cultivar R570 OX=131158 GN=SHCRBa_098_M18_F_30 PE=3 SV=1	GKVVLCDR	2.73	0.225735	946.767	0.0186075	16.7515	15.5602	0	18.3162
A0A059Q0Y0	Ribonucleoside-diphosphate reductase OS=Saccharum hybrid cultivar R570 OX=131158 GN=SHCRBa_201_A23_R_70 PE=3 SV=1	IIDINYYPVETAK	1.62	0.264507	1539.19	0.00512711	16.6014	16.0241	0	18.3059
A0A1B4ZBX3	Maturase (Fragment) OS=Saccharum officinarum OX=4547 GN=matR PE=4 SV=1	EVPPR	5.8	0.175337	597.299	0.0459983	19.6054	17.5672	19.0968	18.2546
A0A059PZK2	F-box domain-containing protein OS=Saccharum hybrid cultivar R570 OX=131158 GN=SHCRBa_027_I07_F_120 PE=4 SV=1	VFCPSTGTGDDDDGK	3.4	0.339259	1570.2	0.0124019	17.9997	0	16.6127	18.2142
A0A5N5XTE9	DNA-directed RNA polymerase subunit beta OS='Saccharum officinarum' phytoplasma SCGS OX=2609813 GN=rpoC PE=4 SV=1	APRLIIK	3.14	0.302837	810.94	0.0121783	16.9694	17.4756	0	18.2042
A0A5N5XVF2	DNA polymerase III subunit delta OS='Saccharum officinarum' phytoplasma SCGS OX=2609813 GN=F2B49_01025 PE=4 SV=1	IIDNEK	3.16	0.161991	732.414	0.0258341	16.6382	17.036	15.1261	18.0639
A0A385IUY5	WRKY6 transcription factor OS=Saccharum hybrid cultivar ROC22 OX=676074 GN=WRKY6 PE=2 SV=1	GEDGTGKCTVTGR	8.11	0.179425	1338.27	0.0460449	17.672	17.805	18.1215	18.0491
A0A059Q0Y4	Uncharacterized protein OS=Saccharum hybrid cultivar R570 OX=131158 GN=SHCRBa_011_I19_F_120 PE=4 SV=1	ANDTMNENK	4.26	0.20762	1051.97	0.02059	17.359	17.9173	17.1631	18.0434
A0A5N5XSM8	IS3 family transposase OS='Saccharum officinarum' phytoplasma SCGS OX=2609813 GN=F2B49_00810 PE=4 SV=1; IS3 family transposase (Fragment) OS='Saccharum officinarum' phytoplasma SCGS OX=2609813 GN=F2B49_02020 PE=4 SV=1	VNPKTVYR	8.38	0.238377	975.5	0.00973774	17.5395	18.6813	0	18.0106
A0A059PZ16	Uncharacterized protein OS=Saccharum hybrid cultivar R570 OX=131158 GN=SHCRBa_040_O01_R_10 PE=4 SV=1	LGPHQIR	5.73	0.236945	818.379	0.0100088	18.7401	0	17.7958	18.0034
D8L871	Uncharacterized protein OS=Saccharum hybrid cultivar OX=128810 GN=Sh197G04g_150 PE=4 SV=1	MMSVPIPGK	7.63	4.63092e-13	974.511	0.0359029	16.4124	17.4999	17.2966	17.983
A0A0C6WCQ5	ScMYB70 protein OS=Saccharum hybrid cultivar Co 86032 OX=672234 GN=scMYB70 PE=2 SV=1	GPPVAEL	10.62	0.252102	680.817	0.0271869	18.0267	16.7712	15.7738	17.981
A0A059Q0R5	Protein DETOXIFICATION OS=Saccharum hybrid cultivar R570 OX=131158 GN=SHCRBa_009_G16_R_160 PE=3 SV=1	HLLAED	1.95	0.175608	698.33	0.019204	15.6053	16.5092	0	17.9477
A0A5N5XXD8	Peptide chain release factor 2 OS='Saccharum officinarum' phytoplasma SCGS OX=2609813 GN=F2B49_00705 PE=4 SV=1	AERGIHR	1.37	0.239684	839.356	0.00767298	20.2865	0	18.7155	17.874
A0A059Q225	ATPase, F1 complex, gamma subunit OS=Saccharum hybrid cultivar R570 OX=131158 GN=SHCRBa_083_K20_F_10 PE=4 SV=1	MVTILSPEVAEK	3.99	0.132331	1333.14	0.0101635	18.8167	0	17.8199	17.8529
A0A5N5XSM8	IS3 family transposase OS='Saccharum officinarum' phytoplasma SCGS OX=2609813 GN=F2B49_00810 PE=4 SV=1	AVIQAKLQGMK	1	0.296107	1202.46	0.00973774	18.4513	15.7509	15.6942	17.7555
A0A5N5XT52	50S ribosomal protein L9 OS='Saccharum officinarum' phytoplasma SCGS OX=2609813 GN=rplI PE=4 SV=1	FGIFK	8.54	0.145194	610.135	0.00895358	16.7969	17.6284	0	17.7156
A0A5N5XTV3	DUF2130 domain-containing protein OS='Saccharum officinarum' phytoplasma SCGS OX=2609813 GN=F2B49_00550 PE=4 SV=1	ADFIFK	6.04	0.238342	740.336	3.77214e-07	16.7218	17.8025	0	17.6477
Q5MD07	Glutamine synthetase (Fragment) OS=Saccharum officinarum OX=4547 GN=GSI PE=2 SV=1; Glutamine synthetase OS=Saccharum hybrid cultivar ROC22 OX=676074 GN=GSI PE=2 SV=1	LVTAAIAIR	9.42	0.234804	928.063	0.025072	17.5286	18.0672	15.0569	17.6071
A0A4V0NRW2	NAM-like protein OS=Saccharum hybrid cultivar SP80-3280 OX=193079 GN=Sh431A16_g0060 PE=4 SV=1; NAM-like protein OS=Saccharum hybrid cultivar SP80-3280 OX=193079 GN=Sh231B24_g0090 PE=4 SV=1	LRNVAK	8.12	0.257786	697.035	0.021815	17.439	17.5241	14.789	17.5671
A0A1L2JTE5	Putative COBW domain-containing protein 1, CBWD1 (Fragment) OS=Saccharum hybrid cultivar R570 OX=131158 GN=Sh236J21_g0040 PE=4 SV=1	VAKATAAALVR	4.13	0.355479	1070.24	3.31903e-08	0	15.9749	0	17.5478
A0A059Q396	Uncharacterized protein OS=Saccharum hybrid cultivar R570 OX=131158 GN=SHCRBa_098_E22_R_290 PE=3 SV=1	MFPTTGR	2.85	0.159819	809.897	0.0092945	18.5053	0	0	17.5036
A0A4P8PHI9	Salt overly sensitive OS=Saccharum officinarum x Saccharum spontaneum OX=566566 PE=2 SV=1	MVLGKTFDAGSIIK	2.98	1.38476e-12	1496	0.0152416	17.211	0	0	17.427
A0A059PZ39	Uncharacterized protein OS=Saccharum hybrid cultivar R570 OX=131158 GN=SHCRBa_052_I12_R_150 PE=4 SV=1; Uncharacterized protein OS=Saccharum hybrid cultivar R570 OX=131158 GN=SHCRBa_027_M20_R_140 PE=4 SV=1	DDKNGR	3.73	0.209088	704.966	0.00921235	17.0807	16.4984	0	17.4117
Q5MD10	Glutamine synthetase OS=Saccharum officinarum OX=4547 GN=GS1.b PE=2 SV=1	GASIR	10.9	0.187984	502.512	0.0102556	17.0652	17.9209	0	17.4036
A0A059Q316	Oxidase OS=Saccharum hybrid cultivar R570 OX=131158 GN=SHCRBa_025_L09_F_300 PE=4 SV=1	GVLGGAAVSESDLVPGFR	4.56	0.399942	1729.79	0.0102509	18.5144	16.8275	19.7882	17.3507
A0A059Q1D1	ERECTA-like 2 OS=Saccharum hybrid cultivar R570 OX=131158 GN=SHCRBa_015_H09_R_100 PE=3 SV=1	CDLKGSK	2.45	0.232603	806.922	4.33745e-07	17.4198	0	16.815	17.3135
A0A059Q112	Pentatricopeptide repeat-containing protein OS=Saccharum hybrid cultivar R570 OX=131158 GN=SHCRBa_258_H24_R_420 PE=4 SV=1	ALVSK	1.52	0.242756	517.709	0.0285725	16.7615	17.4497	14.6762	17.2959
Q91MG2	Replication-associated protein OS=Maize streak virus genotype E (isolate Pat) OX=268331 GN=C1/C2 PE=3 SV=1; Replication-associated protein A OS=Maize streak virus genotype E (isolate Pat) OX=268331 GN=C1 PE=3 SV=1	SFLHR	6.02	0.221904	660.378	0.0078028	16.8719	16.2685	0	17.2212
A0A5N5XTT2	tRNA pseudouridine(38-40) synthase TruA OS='Saccharum officinarum' phytoplasma SCGS OX=2609813 GN=truA PE=4 SV=1	AIKLLEGEK	8.64	0.133017	999.419	0.00936278	18.1828	16.367	16.4443	17.0993
A0A3R5QUB5	PATL2 OS=Saccharum hybrid cultivar ROC22 OX=676074 GN=PATL2 PE=2 SV=1	KALDEFK	5.27	0.243005	849.826	0.00550239	18.5425	16.5372	0	17.0988
A0A059Q1W4	DIOX_N domain-containing protein OS=Saccharum hybrid cultivar R570 OX=131158 GN=SHCRBa_165_I15_F_170 PE=4 SV=1	ALGKLMMEVGLMLAHHCDR	9.41	4.56607e-12	2213.39	0.0191416	16.157	0	0	17.0754
A0A3S9KS38	ALMT11 OS=Saccharum hybrid cultivar OX=128810 PE=2 SV=1; ALMT8 OS=Saccharum hybrid cultivar OX=128810 PE=2 SV=1	YDSGSMMVGSYK	5.08	0.302862	1356.65	0.031149	19.408	17.7914	15.5785	17.0668
A0A059Q178	Uncharacterized protein OS=Saccharum hybrid cultivar R570 OX=131158 GN=SHCRBa_119_B13_F_10 PE=4 SV=1	ILGRDK	12.39	0.254585	701.208	0.0472677	15.7276	16.9876	15.9578	17.0532
J9QCY9	Triosephosphate isomerase OS=Saccharum hybrid cultivar GT28 OX=1214490 PE=2 SV=1	EAGTTMDVVAAQTK	5.78	0.119129	1437.61	0.0434932	16.4738	15.3913	14.9027	17.0519
B3VL84	Trehalose-6-phosphate synthase 1 (Fragment) OS=Saccharum spp. complex hybrid OX=707683 GN=TPS1 PE=2 SV=1	LHPDLK	7.55	0.210239	718.624	6.55046e-07	17.4199	0	15.6892	17.0158
A0A059PYY5	Jacalin-like lectin domain containing protein OS=Saccharum hybrid cultivar R570 OX=131158 GN=SHCRBa_027_K06_F_220 PE=4 SV=1; Jacalin-like lectin domain containing protein OS=Saccharum hybrid cultivar R570 OX=131158 GN=SHCRBa_027_K06_F_380 PE=4 SV=1	LLNGTHTHTTK	6.18	0.27434	1220.83	3.43668e-10	17.1505	17.2391	0	16.9897
A0A0A1EQ99	Glucose-6-phosphate 1-dehydrogenase OS=Saccharum hybrid cultivar Yacheng05-179 OX=1472232 PE=2 SV=1	DVPGDIFR	6.94	0.241747	919.594	0.0452018	16.0622	16.407	16.193	16.9779
A0A059PYW6	Uncharacterized protein OS=Saccharum hybrid cultivar R570 OX=131158 GN=SHCRBa_167_G07_R_10 PE=4 SV=1	SGSASR	3.51	0.244801	563.73	0.00571026	19.0224	17.4603	0	16.9776
A0A2R4QND3	Glycosyl hydrolase OS=Saccharum hybrid cultivar SP80-3280 OX=193079 GN=Shy3280Sca012_045 PE=4 SV=1; Glycosyl hydrolase OS=Saccharum hybrid cultivar SP80-3280 OX=193079 GN=Shy3280Sca010_063 PE=4 SV=1; Glycosyl hydrolase OS=Saccharum hybrid cultivar SP80-3280 OX=193079 GN=Shy3280Sca009_036 PE=4 SV=1	APPSASGLR	12.1	2.28475e-13	854.368	0.00556474	17.9232	17.6388	0	16.9122
A0A059Q0F3	High-affinity potassium transporter OS=Saccharum hybrid cultivar R570 OX=131158 GN=SHCRBa_024_H17_R_20 PE=4 SV=1	ALFLFTGR	7.4	4.57267e-13	924.471	0.0198387	19.9334	19.6014	20.7603	16.8001
A0A5N5XT64	Citrate lyase subunit beta (Fragment) OS='Saccharum officinarum' phytoplasma SCGS OX=2609813 GN=F2B49_01495 PE=4 SV=1	HELLFARNMIVHAAR	7.17	0.38122	1792.7	0.0472584	18.392	17.516	19.1742	16.7609
A0A0A0UE92	rRNA adenine N(6)-methyltransferase OS=Saccharum officinarum OX=4547 GN=LA146H19_003 PE=3 SV=1; rRNA adenine N(6)-methyltransferase OS=Saccharum hybrid cultivar OX=128810 GN=Sh053A11g_110 PE=3 SV=1	EKCHATK	2.03	0.043867	875.513	0.0139789	16.3794	15.4377	0	16.7473
A0A059Q102	Growth-regulating factor OS=Saccharum hybrid cultivar R570 OX=131158 GN=SHCRBa_227_O17_R_100 PE=4 SV=1; Growth-regulating factor OS=Saccharum hybrid cultivar R570 OX=131158 GN=SHCRBa_239_H20_R_10 PE=4 SV=1; Growth-regulating factor OS=Saccharum hybrid cultivar R570 OX=131158 GN=SHCRBa_142_B14_R_210 PE=4 SV=1; Growth-regulating factor OS=Saccharum hybrid cultivar R570 OX=131158 GN=SHCRBa_201_D09_R…	AGAAATAGR	2.47	0.145452	746.184	0.00851535	17.2894	0	0	16.7205
A0A5N5XWT7	Excinuclease ABC subunit UvrC OS='Saccharum officinarum' phytoplasma SCGS OX=2609813 GN=uvrC PE=4 SV=1	ENIQLPDLILVDGGK	6.87	0.448016	1623.64	0.0116377	16.0786	0	0	16.6557
A0A059PZY0	PB1 domain-containing protein OS=Saccharum hybrid cultivar R570 OX=131158 GN=SHCRBa_137_O14_R_20 PE=4 SV=1	WVASVIKR	3.07	5.71418e-13	959.375	0.0412049	18.8042	17.9008	20.4833	16.5691
A0A0M4B7I8	Actin (Fragment) OS=Colletotrichum falcatum OX=129314 PE=4 SV=1; Actin (Fragment) OS=Colletotrichum sp. CP-CC027 OX=1705303 PE=4 SV=1	MCKAGFAGDDAPR	5.38	0.334723	1410.69	0.0434067	13.5376	14.707	0	16.5647
A0A059Q234	PORR domain-containing protein OS=Saccharum hybrid cultivar R570 OX=131158 GN=SHCRBa_166_F02_R_60 PE=4 SV=1; PORR domain-containing protein OS=Saccharum hybrid cultivar R570 OX=131158 GN=SHCRBa_254_D06_F_230 PE=4 SV=1; PORR domain-containing protein OS=Saccharum hybrid cultivar R570 OX=131158 GN=SHCRBa_172_K24_R_40 PE=4 SV=1	AALPPRTR	3.4	0.00375616	882.732	6.47007e-08	0	16.3641	17.103	16.5326
A0A059Q1S8	Uncharacterized protein OS=Saccharum hybrid cultivar R570 OX=131158 GN=SHCRBa_028_K12_R_180 PE=4 SV=1	AGGLHGLK	8.97	0.229185	750.386	0.00962726	16.9982	16.8122	0	16.4309
A0A059PYV8	Sugar transport protein-like protein OS=Saccharum hybrid cultivar R570 OX=131158 GN=SHCRBa_028_H13_R_100 PE=4 SV=1	IRSNLGTAFGYSVTR	8.04	0.183956	1641.47	0.00462925	0	20.7164	0	16.3499
A0A2R4QN67	Leaf senescence related protein-like OS=Saccharum hybrid cultivar SP80-3280 OX=193079 GN=Shy3280Sca003_080 PE=4 SV=1	AWGHLEWDGKR	6.76	0.236788	1354.35	0.0109805	15.5906	15.8524	0	16.3463
A0A292QBA0	Acetolactate synthase small subunit 2 protein OS=Saccharum hybrid cultivar LCP 85-384 OX=130727 GN=VAT2 PE=4 SV=1; Acetolactate synthase small subunit 2 protein OS=Saccharum spontaneum OX=62335 GN=VAT2 PE=4 SV=1	MGETAPFWR	4.81	1.14404e-12	1110.76	0.0062757	16.5766	16.8785	0	16.2614
A0A059Q027	Uncharacterized protein OS=Saccharum hybrid cultivar R570 OX=131158 GN=SHCRBa_250_M20_F_440 PE=4 SV=1	HGGGGFTVLR	7.43	0.199989	999.899	0.0496609	16.4823	17.626	16.6161	16.2208
A0A2K9REL5	Serine/threonine protein kinase SAPK4 OS=Saccharum hybrid cultivar Co 740 OX=709326 PE=2 SV=1	EARTLPK	2.37	0.233697	814.515	0.00238472	19.8494	19.942	0	16.2136
A0A2I7FRL7	Calcineurin B-like protein 4 OS=Saccharum hybrid cultivar ROC22 OX=676074 PE=2 SV=1	ANLFADR	6.53	0.240878	807.582	0.0263854	14.006	16.4208	15.1305	16.15
A0A5N5XUZ8	Translation initiation factor IF-2 OS='Saccharum officinarum' phytoplasma SCGS OX=2609813 GN=F2B49_01950 PE=4 SV=1	IISLKHLK	1.26	2.39855e-12	950.46	0.0412341	18.3946	18.4917	17.6025	16.1442
I6WA52	9-cis-epoxycarotenoid dioxygenase (Fragment) OS=Saccharum hybrid cultivar OX=128810 GN=NCED3 PE=2 SV=1	VRINLR	18.24	0.241908	769.732	1.48585e-10	0	0	0	16.0975
A0A059PZ44	Uncharacterized protein OS=Saccharum hybrid cultivar R570 OX=131158 GN=SHCRBa_144_K17_F_320 PE=4 SV=1	LSTGFGDCALR	2.38	0.114546	1196.66	0.0117931	16.6592	16.8893	16.7357	15.9096
A0A059VK55	BZIP transcription factor 18 (Fragment) OS=Saccharum hybrid cultivar CoC 671 OX=672237 GN=bZIP18 PE=2 SV=1	SFGSEGDMVDLQARMELK	1.74	0.243059	2013.51	0.00552009	13.7072	17.1603	16.3287	15.8801
A0A0U2IVR2	SUT5-h1 OS=Saccharum spontaneum OX=62335 PE=4 SV=1; SUT5-h2 OS=Saccharum spontaneum OX=62335 PE=4 SV=1	RLGDTK	2.39	0.243347	688.66	0.0129686	15.2461	0	16.1219	15.8066
A1Z0K0	Non-TIR-NBS-LRR type resistance protein OS=Saccharum officinarum OX=4547 PE=2 SV=1	DLALAVAK	3.71	0.236324	801.625	0.0101218	16.0429	14.74	0	15.74
A0A5N5XT23	Holliday junction branch migration protein RuvA OS='Saccharum officinarum' phytoplasma SCGS OX=2609813 GN=ruvA PE=4 SV=1	LLEFPGIGK	14.28	0.157605	975.02	0.0487144	15.1774	16.5177	15.9974	15.7395
A0A059PZU8	RECA_2 domain-containing protein OS=Saccharum hybrid cultivar R570 OX=131158 GN=SHCRBa_055_F12_R_170 PE=4 SV=1	EMVPQSLQEVNK	20.66	0.39558	1417.52	0.0162391	13.08	16.3736	0	15.6911
A0A5N5XT31	Magnesium-translocating P-type ATPase OS='Saccharum officinarum' phytoplasma SCGS OX=2609813 GN=mgtA PE=4 SV=1	ISLQESSK	4.49	0.247936	891.962	0.043318	15.2422	16.6886	16.5848	15.614
A0A059Q2F3	BES1_N domain-containing protein OS=Saccharum hybrid cultivar R570 OX=131158 GN=SHCRBa_176_L06_F_70 PE=4 SV=1	HSKASR	5.95	0.169764	683.166	0.00634486	17.2456	0	0	15.4679
A0A059PZD4	LRRNT_2 domain-containing protein OS=Saccharum hybrid cultivar R570 OX=131158 GN=SHCRBa_161_O13_R_110 PE=4 SV=1	SPPPPVK	6.72	0.180855	720.81	0.0444121	14.3932	13.1295	15.4555	15.292
A0A2R4QNM9	Uncharacterized protein OS=Saccharum hybrid cultivar SP80-3280 OX=193079 GN=Shy3280Sca041_109 PE=4 SV=1	ANTTKTK	9.84	0.275646	762.183	0.0462446	15.3502	15.7303	16.2749	15.2622
A0A0C6WCT8	ScMYB47 protein OS=Saccharum hybrid cultivar Co 86032 OX=672234 GN=scMYB47 PE=2 SV=1	MVAMAAVK	3.25	0.0834399	836.1	0.00853515	15.4894	0	16.2974	15.2269
A0A075TDY4	Ascorbate peroxidase OS=Saccharum hybrid cultivar Yacheng05-179 OX=1472232 GN=APX PE=2 SV=1; Chloroplast thylakoid-bound ascorbate peroxidase (Fragment) OS=Saccharum hybrid cultivar GT28 OX=1214490 PE=2 SV=1	EIVALSGAHTLGR	2.65	0.278299	1323.56	0.0109784	13.8335	15.5433	0	15.141
A0A059Q2Y4	Serine hydroxymethyltransferase OS=Saccharum hybrid cultivar R570 OX=131158 GN=SHCRBa_028_G23_R_30 PE=3 SV=1; Serine hydroxymethyltransferase OS=Saccharum hybrid cultivar R570 OX=131158 GN=SHCRBa_013_F04_F_10 PE=3 SV=1; Serine hydroxymethyltransferase OS=Saccharum hybrid cultivar R570 OX=131158 GN=SHCRBa_172_L15_R_80 PE=3 SV=1	AGMIFYR	3.12	0.164267	872.608	0.0087507	14.5023	17.9122	0	15.0974
A0A059PZI2	ATP binding protein OS=Saccharum hybrid cultivar R570 OX=131158 GN=SHCRBa_225_M19_F_360 PE=4 SV=1	ELGMQVTK	3.08	0.364374	921.421	0.00899443	13.9346	15.102	0	15.0705
Q4JEY6	Sialyltransferase-like protein OS=Saccharum officinarum OX=4547 GN=stv2 PE=2 SV=1	IHSPMRGDPR	2.45	0.239966	1167.57	0.0484731	17.2923	18.6196	19.0098	15.0241
A0A059Q2S5	Glossy1 protein OS=Saccharum hybrid cultivar R570 OX=131158 GN=SHCRBa_029_O19_R_190 PE=3 SV=1	ADKMGVK	1.36	0.0832015	765.749	0.0350336	15.6443	14.7544	16.4302	14.9988
A0A3R5U230	SFH1 OS=Saccharum hybrid cultivar ROC22 OX=676074 GN=SFH1 PE=2 SV=1	AIDASTK	5.08	0.015432	705.879	0.00143813	12.366	15.3073	15.6584	14.8642
A0A2R4QNT6	ATROPGEF7 OS=Saccharum hybrid cultivar SP80-3280 OX=193079 GN=Shy3280Sca061_103 PE=4 SV=1	AGVGDAIYR	12.14	0.279389	921.978	0.021947	12.8308	16.595	0	14.6861
Q41409	Glucose transporter OS=Saccharum hybrid cultivar H65-7052 OX=50503 PE=2 SV=1	AGGGMAALGVK	1.84	0.234638	946.371	0.015698	15.5786	16.2318	0	14.5518
A0A059Q3E0	Pentatricopeptide repeat-containing protein OS=Saccharum hybrid cultivar R570 OX=131158 GN=SHCRBa_218_D04_F_240 PE=4 SV=1	AGMYDK	5.16	0.277001	700.021	0.0420492	15.6577	16.3504	16.2514	14.5178
I3WBD3	DNA topoisomerase (ATP-hydrolyzing) (Fragment) OS='Saccharum officinarum' phytoplasma OX=489777 GN=gyrB PE=4 SV=1	GKGAPK	6.65	0.136854	559.39	0.0473443	14.4939	15.6851	0	13.5584
A0A5N5XTZ9	SsrA-binding protein SmpB OS='Saccharum officinarum' phytoplasma SCGS OX=2609813 GN=smpB PE=4 SV=1	IQSKGFFVIPTK	2.28	6.87193e-13	1364.74	0.0213753	16.7549	16.0568	15.6215	12.9767
A0A2R4QNB7	Aldo/keto reductase OS=Saccharum hybrid cultivar SP80-3280 OX=193079 GN=Shy3280Sca008_085 PE=4 SV=1	EAAQIIIK	2.39	0.250556	884.301	0.0386145	12.6975	18.1508	14.5255	12.747
A0A2K9REJ5	HVA22-like protein OS=Saccharum hybrid cultivar Co 740 OX=709326 PE=2 SV=1	AALKDPK	4.92	0.250932	743.061	0.00037141	16.385	16.6257	0	10.997
A0A0U2XKJ8	SUT2-h1 OS=Saccharum spontaneum OX=62335 PE=4 SV=1	DADPSGPRTR	11.77	0.206582	1070.52	0.00685657	17.7431	18.1686	22.0299	0
A0A5N5XW80	Uncharacterized protein OS='Saccharum officinarum' phytoplasma SCGS OX=2609813 GN=F2B49_01185 PE=4 SV=1	AKNIIEK	2.84	0.143528	812.328	0.00750844	19.8463	0	20.6596	0
A0A5N5XV44	Deoxyribonuclease IV OS='Saccharum officinarum' phytoplasma SCGS OX=2609813 GN=F2B49_02045 PE=4 SV=1	IFENTSLYHTK	2.37	0.191372	1353.76	0.0122577	0	20.4869	20.5299	0
A0A2H4YIM1	Expansin 77 OS=Saccharum hybrid cultivar OX=128810 GN=EXP77 PE=2 SV=1	GCAAATAAAEMDDWK	4.1	0.32853	1567.17	0.0150692	21.6068	20.3999	20.2868	0
A0A1L2K5W2	Phosphate transporter Pht1-6 OS=Saccharum hybrid cultivar OX=128810 GN=PTH1 PE=2 SV=1	TMETNAVEEVFR	3.33	0.219716	1442.11	0.011788	19.3874	0	20.2729	0
A0A059Q3B3	CRM family member OS=Saccharum hybrid cultivar R570 OX=131158 GN=SHCRBa_160_O06_F_30 PE=4 SV=1	HAAIR	5.19	0.167378	567.874	0.0204847	18.4295	0	20.1152	0
A0A059Q1V2	mTERF family protein OS=Saccharum hybrid cultivar R570 OX=131158 GN=SHCRBa_184_K13_R_70 PE=4 SV=1	FVVANASMLGSAR	1.37	6.8648e-13	1339.83	0.00453932	20.6023	21.6207	19.5964	0
A0A2R4QND4	Unknow OS=Saccharum hybrid cultivar SP80-3280 OX=193079 GN=Shy3280Sca012_004 PE=4 SV=1	LQKLSVEK	4.75	0.186218	944.61	0.0102974	18.7228	20.4381	19.5885	0
A0A059Q052	Replication protein A subunit OS=Saccharum hybrid cultivar R570 OX=131158 GN=SHCRBa_117_K09_R_230 PE=3 SV=1; Replication protein A subunit OS=Saccharum hybrid cultivar R570 OX=131158 GN=SHCRBa_035_B09_R_200 PE=3 SV=1; Replication protein A subunit OS=Saccharum hybrid cultivar R570 OX=131158 GN=SHCRBa_196_O13_R_500 PE=3 SV=1	FYEVVEVGKVYVVSR	5.5	0.340728	1773.26	2.05391e-14	0	0	19.1425	0
A0A059Q0G9	CaM_binding domain-containing protein OS=Saccharum hybrid cultivar R570 OX=131158 GN=SHCRBa_162_H04_R_100 PE=4 SV=1	FSNAER	10.44	0.158073	724.555	0.0100729	18.7598	0	19.0234	0
A0A2R4QNM6	Ubiquitin-protein ligase TRIP12 OS=Saccharum hybrid cultivar SP80-3280 OX=193079 GN=Shy3280Sca040_132 PE=4 SV=1	AQGEKSLR	6	2.73992e-12	888.876	0.0154141	16.6917	18.3688	19.0224	0
A0A059Q246	Putative mitochondrial inner membrane translocase unit Tim17/Tim22/Tim23/peroxisomal protein PMP24 OS=Saccharum hybrid cultivar R570 OX=131158 GN=SHCRBa_257_A20_R_80 PE=4 SV=1	LDAAMEQR	2.89	0.189537	933.79	0.00760395	17.8417	18.3532	18.4206	0
A0A5N5XSK6	Nitroreductase OS='Saccharum officinarum' phytoplasma SCGS OX=2609813 GN=F2B49_00940 PE=4 SV=1	ECLIGNIK	6.74	0	947.226	0.0136834	17.8722	19.3087	17.8589	0
A0A5N5XSN7	DNA primase OS='Saccharum officinarum' phytoplasma SCGS OX=2609813 GN=dnaG PE=4 SV=1	DKEIQK	2.62	0.278778	758.987	0.0180226	17.2664	17.2412	17.8508	0
A0A1L2YZG6	Putative fructokinase 2 OS=Saccharum spontaneum OX=62335 PE=3 SV=1; Putative fructokinase 2 OS=Saccharum spontaneum OX=62335 PE=3 SV=1	LGGSSAFIGK	3.3	0.235302	936.582	0.0131844	16.9128	17.0698	17.7451	0
A0A059Q0L0	Proteasome assembly chaperone 2 OS=Saccharum hybrid cultivar R570 OX=131158 GN=SHCRBa_028_E10_R_180 PE=3 SV=1	LLGYGPEK	1.44	0.218329	874.843	0.0125511	16.7712	18.1244	17.6495	0
A0A5N5XSR3	30S ribosomal protein S16 OS='Saccharum officinarum' phytoplasma SCGS OX=2609813 GN=rpsP PE=4 SV=1	IVAMQSCNK	5.07	0.210167	1065.69	0.0114165	18.2091	0	17.5609	0
A0A286QWS1	Delta-1-pyrroline-5-carboxylate synthase OS=Saccharum spontaneum OX=62335 GN=P5CS2 PE=2 SV=1; Delta-1-pyrroline-5-carboxylate synthase OS=Saccharum officinarum OX=4547 GN=P5CS PE=2 SV=1; Delta-1-pyrroline-5-carboxylate synthase OS=Saccharum officinarum OX=4547 GN=P5CS PE=2 SV=1	TRTFMK	1.72	0.179683	784.181	0.0120545	16.758	17.5578	17.3337	0
A0A059Q2Q4	Uncharacterized protein OS=Saccharum hybrid cultivar R570 OX=131158 GN=SHCRBa_027_K06_R_350 PE=4 SV=1	NNSDDFVAFGTTVDQSK	3.89	0.1831	1845.07	0.00840549	17.2566	16.2082	17.2907	0
A0A5N5XSN5	Acetate kinase OS='Saccharum officinarum' phytoplasma SCGS OX=2609813 GN=F2B49_00770 PE=4 SV=1	MKIMSVNAGSSSLK	16.69	0.302983	1467.99	2.32432e-08	16.5444	18.3927	17.2628	0
A0A2R4QNN5	Uncharacterized protein OS=Saccharum hybrid cultivar SP80-3280 OX=193079 GN=Shy3280Sca044_019 PE=4 SV=1	AALPRAR	2.74	0.278924	754.583	0.00870309	16.2223	16.616	17.2423	0
A0A059Q035	SKP1-like protein OS=Saccharum hybrid cultivar R570 OX=131158 GN=SHCRBa_217_A17_R_60 PE=3 SV=1; SKP1-like protein OS=Saccharum sinense OX=154766 PE=2 SV=1; SKP1-like protein OS=Saccharum hybrid cultivar R570 OX=131158 GN=SHCRBa_013_F04_F_200 PE=3 SV=1	MAAEGEKK	3.88	0.333273	863.915	0.0109588	16.8374	16.2243	17.1454	0
A0A059PZ85	Nucleic acid binding protein OS=Saccharum hybrid cultivar R570 OX=131158 GN=SHCRBa_050_H11_R_580 PE=4 SV=1	SVVSSSPTSTLMSPPK	2.35	0.251462	1603.82	0.0161965	18.0114	0	17.0865	0
Q66PX5	Mitochondrial uncoupling protein 3 OS=Saccharum officinarum OX=4547 PE=2 SV=1	AEGFR	1.08	4.58863e-13	578.42	7.59449e-08	20.0877	19.3671	16.8189	0
A0A0C6WCS2	ScMYB61 protein OS=Saccharum hybrid cultivar Co 86032 OX=672234 GN=scMYB61 PE=2 SV=1	ISSCVKSK	9.15	0.277982	909.05	0.0080856	17.0523	0	16.5706	0
Q38JD3	Temperature-induced lipocalin OS=Saccharum officinarum OX=4547 GN=TIL PE=2 SV=1	AAAEGK	5.72	0.264421	547.456	0.0105305	16.4296	15.5699	16.4772	0
I3V633	Cytochrome b6-f complex iron-sulfur subunit OS=Saccharum hybrid cultivar ROC22 OX=676074 GN=SLCBCIS PE=2 SV=1	AQSITCQAVSSIPADRVPDMEK	4.21	3.65577e-12	2403.01	0.0160418	16.2805	0	16.2922	0
A0A139ZSG4	NAC1 protein OS=Saccharum spontaneum OX=62335 PE=2 SV=1	AGSSMR	5.28	0.245337	625.372	0.00718289	17.2706	0	16.1855	0
A0A291I971	Sucrose non-fermenting 1-related protein kinase 2.5 OS=Saccharum hybrid cultivar GT21 OX=1214930 GN=SnRK2.5 PE=2 SV=1; Serine/threonine protein kinase SAPK4 OS=Saccharum hybrid cultivar Co 740 OX=709326 PE=2 SV=1	MDKYEPVR	14.77	0.446265	1036.9	0.0175043	14.8888	16.5921	16.1846	0
A0A059PZV8	Uncharacterized protein OS=Saccharum hybrid cultivar R570 OX=131158 GN=SHCRBa_028_E05_R_100 PE=4 SV=1	SIKVASWPK	10.7	0.486461	1015.02	0.00286518	17.1307	19.0842	16.1422	0
A0A059Q2B9	WD_REPEATS_REGION domain-containing protein OS=Saccharum hybrid cultivar R570 OX=131158 GN=SHCRBa_033_L20_F_130 PE=4 SV=1; WD_REPEATS_REGION domain-containing protein OS=Saccharum hybrid cultivar R570 OX=131158 GN=SHCRBa_027_I16_F_270 PE=4 SV=1	ADGAK	4.24	0.244316	461.802	0.00648013	16.1848	0	16.0691	0
D0VLU5	p20Sh249C12 OS=Saccharum hybrid cultivar R570 OX=131158 GN=Sh249C12g_20 PE=4 SV=1	CKLMEMMYTR	1.69	0.525424	1395.76	1.18183e-07	15.4296	17.0706	15.7079	0
A0A059Q2S0	Non-specific serine/threonine protein kinase OS=Saccharum hybrid cultivar R570 OX=131158 GN=SHCRBa_044_M03_F_180 PE=3 SV=1; Non-specific serine/threonine protein kinase OS=Saccharum hybrid cultivar R570 OX=131158 GN=SHCRBa_040_D12_R_380 PE=3 SV=1	KMGFQVHK	19.6	0.22613	974.716	0.00831392	15.7113	15.6393	15.6289	0
A0A2R4QNI4	Purine nucleobase transmembrane transport OS=Saccharum hybrid cultivar SP80-3280 OX=193079 GN=Shy3280Sca028_048 PE=4 SV=1	QPAPAASK	1.4	0.263331	769.114	1.43059e-06	16.0904	16.2705	14.7137	0
A0A5N5XV55	Uncharacterized protein OS='Saccharum officinarum' phytoplasma SCGS OX=2609813 GN=F2B49_01965 PE=4 SV=1	NINAEMISSKLDDK	2.99	0.102349	1593.97	0.00462122	18.1019	0	14.5253	0
A0A2R4QNH5	DNA polymerase OS=Saccharum hybrid cultivar SP80-3280 OX=193079 GN=Shy3280Sca025_046 PE=4 SV=1	MAPTR	7.67	0.27702	571.603	0.0156525	14.5279	0	13.8555	0
J9QCY9	Triosephosphate isomerase OS=Saccharum hybrid cultivar GT28 OX=1214490 PE=2 SV=1; TPI OS=Saccharum officinarum OX=4547 PE=2 SV=1	KFFVGGNWK	3.09	0.23324	1082.03	0.0434932	18.5839	22.2706	0	0
A0A2I8B2B7	Expansin OS=Saccharum hybrid cultivar Co 86032 OX=672234 GN=EXPA1 PE=3 SV=1	AGAIR	5.02	0.210023	484.809	3.04325e-07	18.3847	21.9077	0	0
A0A2L1TG95	JAZ11 OS=Saccharum hybrid cultivar ROC22 OX=676074 GN=JAZ11 PE=2 SV=1	DGAAPR	6.65	0.205931	586.204	0.0215933	20.1331	21.6122	0	0
A0A0C6WCL3	ScMYB54 protein OS=Saccharum hybrid cultivar Co 86032 OX=672234 GN=scMYB54 PE=2 SV=1; ScMYB16 protein OS=Saccharum hybrid cultivar Co 86032 OX=672234 GN=scMYB16 PE=2 SV=1	GAPKQR	4.05	0.167863	652.29	1.5138e-08	19.3318	20.9533	0	0
A0A059Q2S3	Rx_N domain-containing protein OS=Saccharum hybrid cultivar R570 OX=131158 GN=SHCRBa_256_D11_R_240 PE=3 SV=1	RLLQENMEIWR	2.23	0.44091	1484.06	0.0119523	19.7827	19.8701	0	0
A0A2L1TG94	JAZ8 OS=Saccharum hybrid cultivar ROC22 OX=676074 GN=JAZ8 PE=2 SV=1	MDLLER	2.27	0.0516229	789.246	2.2694e-07	18.6811	19.7797	0	0
A0A5N5XSG7	HD domain-containing protein OS='Saccharum officinarum' phytoplasma SCGS OX=2609813 GN=F2B49_00995 PE=4 SV=1	TNFFEFK	1.33	0.154974	933.647	0.0186585	18.0884	19.6549	0	0
A0A059Q194	Wall-associated kinase OS=Saccharum hybrid cultivar R570 OX=131158 GN=SHCRBa_011_C13_F_320 PE=4 SV=1	MSGDGR	7.89	0.0874901	637.474	0.0127841	18.7075	19.5613	0	0
A0A0B4ZWK8	MYB transcription factor (Fragment) OS=Saccharum officinarum OX=4547 GN=MYB2R PE=2 SV=1	AMAAGVLFPNSLFNYLNSR	1.68	0.0489673	2085.31	9.21372e-08	21.4656	19.5264	0	0
A2SXR7	Uricase OS=Saccharum officinarum OX=4547 PE=2 SV=1	TIGAPLTRPMSK	2.45	0.552093	1270.62	0.00377447	21.0438	19.1054	0	0
A0A059PZ42	DUF4220 domain-containing protein OS=Saccharum hybrid cultivar R570 OX=131158 GN=SHCRBa_159_M03_F_110 PE=4 SV=1	ARALSQAR	1.96	0.272429	871.006	0.0107305	18.6906	19.0033	0	0
A0A1Z5AZL5	Hypothetical chloroplast RF68 OS=Saccharum officinarum OX=4547 GN=ycf68 PE=4 SV=1; Hypothetical chloroplast RF68 OS=Saccharum hybrid cultivar OX=128810 GN=ycf68 PE=4 SV=1; Uncharacterized protein ycf68 OS=Saccharum hybrid cultivar RB867515 OX=1890409 GN=ycf68 PE=4 SV=1; Hypothetical chloroplast RF68 OS=Saccharum spontaneum OX=62335 GN=ycf68 PE=4 SV=1; Hypothetical chloroplast RF68 OS=Miscanthus s…	AVINR	10.06	0.364146	571.699	0.0107479	19.0064	18.929	0	0
A0A059PZS8	Acyltransferase OS=Saccharum hybrid cultivar R570 OX=131158 GN=SHCRBa_024_F14_R_310 PE=4 SV=1	AFAANMTR	5.48	0.239591	897.055	0.00870728	16.9489	18.9198	0	0
A0A059Q280	Uncharacterized protein OS=Saccharum hybrid cultivar R570 OX=131158 GN=SHCRBa_184_K13_R_80 PE=4 SV=1	ANAKAVELEK	16.86	0.260585	1072.46	7.07016e-08	19.8317	18.8008	0	0
A0A059VJE8	TLP transcription factor M (Fragment) OS=Saccharum hybrid cultivar CoC 671 OX=672237 GN=TLPM PE=2 SV=1	ESFGNISRR	3.61	0.153776	1065.35	0.00524422	19.0403	18.3578	0	0
A0A059Q072	ADP-ribosylation factor OS=Saccharum hybrid cultivar R570 OX=131158 GN=SHCRBa_261_O20_R_140 PE=3 SV=1	DRVVEAR	1.58	0.148531	843.058	2.65444e-10	19.2375	18.2794	0	0
A0A0U2N320	SUT6-h4 OS=Saccharum spontaneum OX=62335 PE=4 SV=1	DGDGK	5.37	0.203365	491.241	4.88265e-12	17.7287	18.0598	0	0
A0A059Q2G8	Uncharacterized protein OS=Saccharum hybrid cultivar R570 OX=131158 GN=SHCRBa_258_I03_R_370 PE=3 SV=1	LDGLIK	5.05	0.0861264	657.309	2.64526e-10	16.5569	17.972	0	0
A0A5N5XSU2	Uncharacterized protein OS='Saccharum officinarum' phytoplasma SCGS OX=2609813 GN=F2B49_00220 PE=4 SV=1	IMIIISLIQR	2.23	1.82771e-12	1214.69	0.00858022	17.0091	17.7896	0	0
A0A5N5XSP5	Pyruvate kinase OS='Saccharum officinarum' phytoplasma SCGS OX=2609813 GN=pyk PE=4 SV=1	DILAK	12.93	0.290436	559.943	0.00739421	18.4169	17.6451	0	0
A0A5N5XT03	Uncharacterized protein OS='Saccharum officinarum' phytoplasma SCGS OX=2609813 GN=F2B49_01385 PE=4 SV=1	KILENDK	3.59	0.277304	860.074	0.0219102	15.3529	17.3804	0	0
A0A2H4YIR3	Expansin OS=Saccharum hybrid cultivar OX=128810 GN=EXP81 PE=2 SV=1; Expansin OS=Saccharum hybrid cultivar OX=128810 GN=EXP84 PE=2 SV=1; Expansin OS=Saccharum hybrid cultivar OX=128810 GN=EXP3 PE=2 SV=1	YTITGNK	3.74	0.188875	797.104	0.0141702	16.4266	17.3352	0	0
A0A059Q0D3	Putative Alpha/beta hydrolase family OS=Saccharum hybrid cultivar R570 OX=131158 GN=SHCRBa_257_A20_R_110 PE=4 SV=1	AEGVARR	2.12	0.265117	757.678	0.00811134	18.1083	17.1649	0	0
A0A5P8U3S7	Coronatine insensitive protein 1 OS=Saccharum hybrid cultivar OX=128810 GN=COI1 PE=2 SV=1	GGEVPEPRR	5.78	0.0417688	997.644	0.0111076	16.7578	17.164	0	0
A0A5N5XTN7	DNA-directed RNA polymerase subunit beta (Fragment) OS='Saccharum officinarum' phytoplasma SCGS OX=2609813 GN=F2B49_00190 PE=4 SV=1	DSSLR	9.22	0.317961	578.589	0.00745453	16.4839	17.0275	0	0
I6W7G7	Putative serine/threonine-protein kinase OS=Saccharum hybrid cultivar OX=128810 PE=2 SV=1	ELGAGNFGVAR	11.15	0.114345	1089.81	4.78906e-09	17.5325	17.008	0	0
A0A059PZ91	Glycosyltransferase OS=Saccharum hybrid cultivar R570 OX=131158 GN=SHCRBa_260_G14_R_180 PE=3 SV=1	AFGEAVSR	7.17	0.238395	835.765	0.0101307	17.0488	16.9442	0	0
W5RSK7	Phenylalanine ammonia-lyase OS=Saccharum hybrid cultivar HSF-240 OX=1429986 GN=PAL PE=2 SV=1	ELISAIER	2.89	0.209811	930.398	7.41185e-13	16.9526	16.9274	0	0
A0A059Q0B5	Receptor-kinase isolog OS=Saccharum hybrid cultivar R570 OX=131158 GN=SHCRBa_008_B11_F_320 PE=4 SV=1	APEVR	1.57	0.0788808	568.405	0.00596309	18.6356	16.9075	0	0
A0A3S9KS18	ALMT2 OS=Saccharum hybrid cultivar OX=128810 PE=2 SV=1	WEPCHGK	2.26	0.156553	911.952	1.01277e-10	17.2909	16.902	0	0
A0A0A1I5Z7	Syntaxin-related protein KNOLLE OS=Saccharum hybrid cultivar R570 OX=131158 PE=3 SV=1; Syntaxin-related protein KNOLLE OS=Saccharum hybrid cultivar R570 OX=131158 PE=3 SV=1; Oryza sativa protein similar to cytokinesis-specific syntaxin-related protein AAP03411 OS=Saccharum hybrid cultivar OX=128810 GN=Sh265O22g_140 PE=3 SV=1; Syntaxin-related protein KNOLLE OS=Saccharum hybrid cultivar R570 OX=13…	ELGKAK	4.45	0.115032	646.336	0.00877301	17.609	16.8848	0	0
A0A291I967	Sucrose non-fermenting 1-related protein kinase 2.9 OS=Saccharum hybrid cultivar GT21 OX=1214930 GN=SnRK2.9 PE=2 SV=1	MARTPAAAGSAVGMEMPIMHDGDR	3.82	9.13215e-13	2519.4	0.0145393	15.9541	16.7727	0	0
S4VNA6	Calcineurin B-like protein 9 OS=Saccharum hybrid cultivar GT28 OX=1214490 GN=CBL9 PE=2 SV=1; Calcineurin B-like protein 1 OS=Saccharum hybrid cultivar GT28 OX=1214490 GN=CBL1 PE=2 SV=1	IFDLFDVKK	5.54	0.306302	1124.12	2.73284e-07	17.4709	16.7331	0	0
A0A5N5XSZ3	Molecular chaperone DnaK OS='Saccharum officinarum' phytoplasma SCGS OX=2609813 GN=dnaK PE=4 SV=1	AYQKK	3.91	0.321916	636.395	0.00572823	15.8649	16.6923	0	0
A0A059PZC6	AAA domain-containing protein OS=Saccharum hybrid cultivar R570 OX=131158 GN=SHCRBa_008_G08_R_120 PE=3 SV=1	DAAASR	15.39	0.160282	591.105	0.00889446	17.3814	16.6295	0	0
C6ZKI5	ELF4-like protein OS=Saccharum officinarum OX=4547 PE=2 SV=1	IRSGLD	3.46	0.275572	660.884	0.0121666	16.0095	16.6198	0	0
A0A2R4QNM0	Pollen proteins Ole OS=Saccharum hybrid cultivar SP80-3280 OX=193079 GN=Shy3280Sca040_110 PE=4 SV=1	MEGSPDMNRCTAR	7.97	0.353456	1557.26	0.00641489	17.277	16.4701	0	0
A0A059PYU2	Uncharacterized protein OS=Saccharum hybrid cultivar R570 OX=131158 GN=SHCRBa_044_D02_F_100 PE=4 SV=1	MACGSR	3.83	0.342447	696.907	7.57616e-12	16.841	16.2983	0	0
A0A059Q2K8	Uncharacterized protein OS=Saccharum hybrid cultivar R570 OX=131158 GN=SHCRBa_246_L12_R_200 PE=4 SV=1	AAVDR	8	0.215274	531.151	3.717e-06	16.5993	16.2585	0	0
A0A059Q1N3	Multivesicular body protein OS=Saccharum hybrid cultivar R570 OX=131158 GN=SHCRBa_035_H11_R_230 PE=4 SV=1; Charged multivesicular body protein OS=Saccharum hybrid cultivar R570 OX=131158 GN=SHCRBa_040_O01_R_260 PE=4 SV=1	AIREAAK	4.63	0.252686	759.573	3.02848e-07	12.9028	16.2204	0	0
A0A059Q119	Uncharacterized protein OS=Saccharum hybrid cultivar R570 OX=131158 GN=SHCRBa_162_H04_F_220 PE=4 SV=1	QVYELHR	5.84	0.00598702	943.775	0.00496099	17.0807	16.1825	0	0
A0A059Q328	3-ketodihydrosphingosine reductase OS=Saccharum hybrid cultivar R570 OX=131158 GN=SHCRBa_012_P16_F_10 PE=4 SV=1	ADDVAKK	3.8	0.22641	746.5	0.00297311	19.4882	16.0515	0	0
A0A059PYW7	Uncharacterized protein OS=Saccharum hybrid cultivar R570 OX=131158 GN=SHCRBa_007_O13_F_110 PE=4 SV=1; Uncharacterized protein OS=Saccharum hybrid cultivar R570 OX=131158 GN=SHCRBa_016_K03_R_210 PE=4 SV=1; Uncharacterized protein OS=Saccharum hybrid cultivar R570 OX=131158 GN=SHCRBa_023_A24_F_70 PE=4 SV=1; Uncharacterized protein OS=Saccharum hybrid cultivar R570 OX=131158 GN=SHCRBa_028_K12_R_160…	ASIFAHK	4.32	0.252069	772.632	0.00306387	16.8486	16.0088	0	0
A9Z0U5	Succinate-semialdehyde dehydrogenase OS=Saccharum officinarum OX=4547 GN=ALDH5F1 PE=2 SV=1	AMATMAMR	2.49	0.0290481	896.279	0.0171464	15.7469	15.9306	0	0
A0A059Q126	Pentatricopeptide repeat-containing protein OS=Saccharum hybrid cultivar R570 OX=131158 GN=SHCRBa_261_D02_R_130 PE=4 SV=1	TREAEK	3.21	0.248694	733.545	0.00519229	17.0214	15.8298	0	0
A0A0K0L9T8	Endoglucanase OS=Saccharum officinarum OX=4547 GN=LA57E04_014 PE=3 SV=1; Endoglucanase OS=Saccharum hybrid cultivar OX=128810 GN=Sh253G12g_350 PE=3 SV=1; Endoglucanase OS=Saccharum hybrid cultivar OX=128810 GN=Sh015N23g_210 PE=3 SV=1; Endoglucanase OS=Saccharum hybrid cultivar OX=128810 GN=Sh197G04g_100 PE=3 SV=1	GASMPSVR	15.1	0.243589	820.216	0.00491536	15.2267	14.4931	0	0
A0A059PZ87	Pentatricopeptide repeat-containing protein OS=Saccharum hybrid cultivar R570 OX=131158 GN=SHCRBa_029_J02_R_150 PE=4 SV=1	AGLLEDAR	5.09	0.189103	844.34	0.0038771	15.9437	14.2487	0	0
A0A5N5XSI1	Tyrosine recombinase OS='Saccharum officinarum' phytoplasma SCGS OX=2609813 GN=F2B49_01020 PE=4 SV=1	ISSKTLAR	6.19	0.248485	874.778	2.8733e-08	20.2064	0	0	0
A0A4P2THY0	NAM-like protein OS=Saccharum hybrid cultivar SP80-3280 OX=193079 GN=Sh276O20_g0160 PE=4 SV=1; NAM-like protein OS=Saccharum hybrid cultivar SP80-3280 OX=193079 GN=Sh231B24_g0090 PE=4 SV=1	DEKIK	2.03	0	632.531	1.43452e-12	20.0172	0	0	0
A0A059Q0D6	Uncharacterized protein OS=Saccharum hybrid cultivar R570 OX=131158 GN=SHCRBa_011_L19_R_60 PE=4 SV=1; Uncharacterized protein OS=Saccharum hybrid cultivar R570 OX=131158 GN=SHCRBa_004_J16_R_110 PE=4 SV=1; Uncharacterized protein OS=Saccharum hybrid cultivar R570 OX=131158 GN=SHCRBa_001_L05_R_310 PE=4 SV=1; Uncharacterized protein OS=Saccharum hybrid cultivar R570 OX=131158 GN=SHCRBa_008_G08_R_70 …	GATAR	7.95	0.287796	475.069	3.90941e-10	19.9398	0	0	0
A0A0C6WCM9	ScMYB38 protein OS=Saccharum hybrid cultivar Co 86032 OX=672234 GN=scMYB38 PE=2 SV=1	ALAQIDR	18.02	0.26308	787.073	9.40896e-08	19.8222	0	0	0
A0A059Q1P3	Digalactosyldiacylglycerol synthase OS=Saccharum hybrid cultivar R570 OX=131158 GN=SHCRBa_059_B13_R_90 PE=4 SV=1	FSKEMR	2.4	0.389844	797.121	1.12951e-07	19.5784	0	0	0
A0A5N5XVP1	Elongation factor 4 OS='Saccharum officinarum' phytoplasma SCGS OX=2609813 GN=lepA PE=4 SV=1	AKNICQK	4.18	0.226797	863.171	4.01625e-11	19.5183	0	0	0
W5RSQ2	Phenylalanine ammonia-lyase OS=Saccharum hybrid cultivar Co 1148 OX=672232 GN=PAL PE=2 SV=1	VDAAGAFK	3.56	0.207476	779.496	4.87715e-09	19.2285	0	0	0
A0A5N5XTI8	NADP-dependent malic enzyme OS='Saccharum officinarum' phytoplasma SCGS OX=2609813 GN=F2B49_00800 PE=4 SV=1	EGAIHK	5.06	0.273605	653.664	3.41476e-11	18.7182	0	0	0
A0A0C6WCR6	ScMYB31 protein OS=Saccharum hybrid cultivar Co 86032 OX=672234 GN=scMYB31 PE=2 SV=1	APCCAK	6.52	0.236392	703.276	4.85312e-12	18.6613	0	0	0
A0A2R4QNS6	Heme oxygenase 2 OS=Saccharum hybrid cultivar SP80-3280 OX=193079 GN=Shy3280Sca057_010 PE=4 SV=1	DLEWFR	7.87	0.319735	864.933	4.16268e-08	18.5382	0	0	0
A0A059Q0S8	DNA replication complex GINS protein SLD5 OS=Saccharum hybrid cultivar R570 OX=131158 GN=SHCRBa_022_B01_F_250 PE=3 SV=1	GLVEGGR	5.16	0.119884	686.303	4.50644e-11	18.5225	0	0	0
A0A5N5XST3	30S ribosomal protein S21 OS='Saccharum officinarum' phytoplasma SCGS OX=2609813 GN=F2B49_00505 PE=4 SV=1	TKTIVK	1.99	0.1872	685.671	4.55754e-11	18.1665	0	0	0
A0A4P2TFX8	Uncharacterized protein OS=Saccharum hybrid cultivar SP80-3280 OX=193079 GN=Sh285K15_g0030 PE=4 SV=1; Uncharacterized protein OS=Saccharum hybrid cultivar SP80-3280 OX=193079 GN=Sh276O20_g0090 PE=4 SV=1	VDSVLNDNPGEQPK	6.11	0.325396	1511.5	0	17.8289	0	0	0
A0A2R4QNG2	Taxadienol acetyl transferase OS=Saccharum hybrid cultivar SP80-3280 OX=193079 GN=Shy3280Sca004_047 PE=4 SV=1	AASPPTVTK	4.23	1.15852e-13	871.08	2.24281e-09	17.6367	0	0	0
A0A3G5AXU1	Magnesium transporter OS=Saccharum spontaneum OX=62335 PE=3 SV=1; Magnesium transporter OS=Saccharum spontaneum OX=62335 PE=3 SV=1	TGLPARDLR	4.18	0.16262	999.08	0	17.6194	0	0	0
A0A059Q333	Dynamin-related protein OS=Saccharum hybrid cultivar R570 OX=131158 GN=SHCRBa_165_I15_R_180 PE=3 SV=1	KEIADETDR	4.55	0.114778	1075.99	2.038e-10	17.5557	0	0	0
A0A5N5XST5	50S ribosomal protein L4 OS='Saccharum officinarum' phytoplasma SCGS OX=2609813 GN=rplD PE=4 SV=1	QKGTGNAR	5.97	0.068461	830.954	2.2625e-09	17.5478	0	0	0
A0A059PZL8	ATP binding protein OS=Saccharum hybrid cultivar R570 OX=131158 GN=SHCRBa_258_H24_F_60 PE=3 SV=1	GPSCGSR	1.22	0.186386	720.362	2.10942e-15	17.5367	0	0	0
A0A059PZR1	Leucine rich repeat protein OS=Saccharum hybrid cultivar R570 OX=131158 GN=SHCRBa_001_I10_F_190 PE=4 SV=1	LDIPADDSRCTR	4.07	0.425991	1419.71	5.1914e-13	17.4677	0	0	0
A0A059Q2N4	Uncharacterized protein OS=Saccharum hybrid cultivar R570 OX=131158 GN=SHCRBa_050_H11_R_20 PE=4 SV=1	ASETNQK	5.87	0.150025	777.177	1.27786e-11	17.4187	0	0	0
A0A059Q3A8	ADP-glucose pyrophosphorylase OS=Saccharum hybrid cultivar R570 OX=131158 GN=SHCRBa_022_D05_R_200 PE=4 SV=1	VSAIILGEGTGSQLFPLTSTR	3.06	0.321267	2147.59	1.03057e-08	17.3991	0	0	0
A0A059Q0Y3	S1-like domain-containing protein OS=Saccharum hybrid cultivar R570 OX=131158 GN=SHCRBa_013_P09_R_180 PE=3 SV=1	VWIAAGDIVLVGLR	3.99	2.30198e-13	1480.88	0	17.2249	0	0	0
A0A2R4QNH6	Signal recognition particle receptor OS=Saccharum hybrid cultivar SP80-3280 OX=193079 GN=Shy3280Sca024_073 PE=4 SV=1	ATVVK	4.75	0.24787	517.432	1.14718e-10	17.0792	0	0	0
A0A0C6WCL1	ScMYB44 protein OS=Saccharum hybrid cultivar Co 86032 OX=672234 GN=scMYB44 PE=2 SV=1	GGLDSPGLPIDK	10.88	0.524217	1167.96	5.63438e-13	16.7488	0	0	0
C7IVT4	Uncharacterized protein OS=Saccharum hybrid cultivar OX=128810 GN=Sh265O22g_80 PE=4 SV=1; Magnesium-dependent phosphatase 1 OS=Saccharum hybrid cultivar R570 OX=131158 PE=4 SV=1; Magnesium-dependent phosphatase 1 OS=Saccharum hybrid cultivar R570 OX=131158 PE=4 SV=1	GDERVK	5.98	0.271294	703.613	6.67788e-11	16.5971	0	0	0
E9N3N2	BZIP transcription factor OS=Saccharum hybrid cultivar Q117 OX=664941 PE=2 SV=1	SSELLK	8.08	0.318869	674.955	1.44329e-15	16.5574	0	0	0
A0A161I1I8	CENH3 histone protein (Fragment) OS=Saccharum officinarum OX=4547 GN=CENH3 PE=2 SV=1	RVTVMQK	3.51	0.0771798	875.622	5.10947e-11	16.4215	0	0	0
A0A0C6WCR8	ScMYB41 protein OS=Saccharum hybrid cultivar Co 86032 OX=672234 GN=scMYB41 PE=2 SV=1	GVKIFGVR	5.47	0.201207	874.373	1.59447e-07	16.4015	0	0	0
A0A059Q0A7	Uncharacterized protein OS=Saccharum hybrid cultivar R570 OX=131158 GN=SHCRBa_063_N24_F_260 PE=4 SV=1; Uncharacterized protein OS=Saccharum hybrid cultivar R570 OX=131158 GN=SHCRBa_179_G22_F_140 PE=4 SV=1; Uncharacterized protein OS=Saccharum hybrid cultivar R570 OX=131158 GN=SHCRBa_014_G09_R_50 PE=4 SV=1	EAGGGGKR	4.83	0.199589	731.027	3.18134e-08	16.3159	0	0	0
A0A3G1RNS2	Maturase K (Fragment) OS=Saccharum hybrid cultivar NCo 376 OX=664940 GN=matK PE=3 SV=1; Maturase K (Fragment) OS=Saccharum robustum OX=62334 GN=matK PE=3 SV=1; Maturase K (Fragment) OS=Saccharum hybrid cultivar OX=128810 GN=matK PE=3 SV=1; Maturase K OS=Saccharum hybrid cultivar OX=128810 GN=matK PE=3 SV=1; Maturase K OS=Miscanthus sinensis subsp. sinensis OX=1068733 GN=matK PE=3 SV=1; Maturase K…	IIFSGK	7.51	0.138679	663.453	2.49393e-08	16.2722	0	0	0
A0A059PZQ2	Uncharacterized protein OS=Saccharum hybrid cultivar R570 OX=131158 GN=SHCRBa_159_M03_F_120 PE=4 SV=1	EEEDGPK	1.58	0.177894	803.649	3.25606e-12	16.2475	0	0	0
A0A2R4QNJ4	Uncharacterized protein OS=Saccharum hybrid cultivar SP80-3280 OX=193079 GN=Shy3280Sca034_048 PE=4 SV=1	SETEMALR	1.05	0.283307	937.309	3.9752e-11	16.202	0	0	0
A0A059VE75	TLP transcription factor L (Fragment) OS=Saccharum hybrid cultivar CoC 671 OX=672237 GN=TLPL PE=2 SV=1; TLP transcription factor O (Fragment) OS=Saccharum hybrid cultivar CoC 671 OX=672237 GN=TLPO PE=2 SV=1	DGFGSLSRR	7.71	0.133101	995.284	2.75784e-05	16.1948	0	0	0
A0A059Q0W6	Uncharacterized protein OS=Saccharum hybrid cultivar R570 OX=131158 GN=SHCRBa_168_J15_R_60 PE=4 SV=1	AAIHEMCR	4.37	0.252931	1002.86	1.4536e-10	16.1663	0	0	0
A0A059Q206	Uncharacterized protein OS=Saccharum hybrid cultivar R570 OX=131158 GN=SHCRBa_011_I19_F_320 PE=4 SV=1	LPGMR	2.45	0.127418	573.054	2.74356e-09	16.0634	0	0	0
A0A059Q1C9	Uncharacterized protein OS=Saccharum hybrid cultivar R570 OX=131158 GN=SHCRBa_012_P16_F_190 PE=4 SV=1	AENIWLAAEGVYLPVNGSK	1.83	0.111436	2030.67	4.46322e-05	15.9333	0	0	0
